# Supplementary material for: Porcine Circovirus Modulates Swine Influenza Virus Replication in Pig Tracheal Epithelial Cells and Porcine Alveolar Macrophages
Source: Preprints.org preprint supplement (doi:10.20944/preprints202304.0781.v1), 2023-04-23
Supplement: Supplementary file 1 [file Supplemental table S1. List of primers .docx]

**Supplemental table S1. List of primers and probe used for PCV2b quantification and primers used in RT-qPCR for cytokines mRNA quantification in NPTr and iPAM 3D4/21 cells**

| **Target** | **Primers and probes 5’- 3’** | **References** |
| --- | --- | --- |
| PCV2 (ORF1) | F: GGC CAC CTG GGT GTG GTA AA  R: CCC ACC ACT TGT TTC TAG GTG GTT  Probe 6-FAM-TTT GCA GAC CCG GAA ACC ACA TAC TGG A-BHQ-1) | [1] |
| IL-6 | F: ACTCCCTCTCCACAAGCGCCTT  R: TGGCATCTTCTTCCAGGCGTCCC | [2] |
| IL-8 | F: TGTGAGGCTGCAGTTCTGGCAAG  R: GGGTGGAAAGGTGTGGAATGCGT |
| IL-10 | F: GCTGCGGCGCTGTCATCAATT  R: ACCCATGGCTTTGTAGACACCCC |
| IFN-α | F: ACTCCATCCTGGCTGTGAGGAAAT  R: TCTGTCTTGCAGGTTTGTGGAGGA | [3] |
| IFN-β | F: CTCTCCTGATGTGTTTCTCC  R: GTTCATCCTATCTTCGAGGC |
| IFN- γ | F: GAGCCAAATTGTCTCCTTCTAC  R: CGAAGTCATTCAGTTTCCCAG |
| B2M | F: GTGCTATCTCCACGTTTGAG  R: GCTTCGAGTGCAAGAGATTG |
| B-actin | F: ACCACTGGCATTGTCATGGACTCT  R: ATCTTCATGAGGTAGTCGGTCAGG |
| PPIA | F: TGCAGACAAAGTTCCAAAGACAG  R: GCCACCAGTGCCATTATGG |

1. Gagnon, C.A., del Castillo, J.R., Music, N., Fontaine, G., Harel, J., and Tremblay, D., *Development and use of a multiplex real-time quantitative polymerase chain reaction assay for detection and differentiation of Porcine circovirus-2 genotypes 2a and 2b in an epidemiological survey.* J Vet Diagn Invest, 2008. **20**(5): p. 545-58.

2. Alvarez, F., *Création d'un modèle cellulaire des voies respiratoires du porc pour étudier les effets d'une co-infection virale au virus du syndrome reproducteur et respiratoire porcin et au circovirus porcin.* Master thesis in Papyrus : Institutional Repository of Université de Montréal, 2014.

3. Hernandez Reyes, Y., Provost, C., Traesel, C.K., Jacques, M., and Gagnon, C.A., *Actinobacillus pleuropneumoniae culture supernatant antiviral effect against porcine reproductive and respiratory syndrome virus occurs prior to the viral genome replication and transcription through actin depolymerization.* J Med Microbiol, 2018. **67**(2): p. 249-264.

References
