# Supplementary material for: Porcine Circovirus Modulates Swine Influenza Virus Replication in Pig Tracheal Epithelial Cells and Porcine Alveolar Macrophages
Source: Preprints.org preprint supplement (doi:10.20944/preprints202304.0781.v1), 2023-04-23
Supplement: Supplementary file 3 [file Supplemental table S3. Down-rgulated genes in NPTr cells.docx]

**Supplemental table S3.** **Down-regulated genes in NPTr cells**

| **PCV2b/H1N1** |  | **PCV2b** |  | **H1N1** |  |
| --- | --- | --- | --- | --- | --- |
| Gene ID | Fold change | Gene ID | Fold change | Gene ID | Fold change |
| DIAPH2 | -18,95 | YPEL2 | -21,80 | gene:ENSSSCG00000043033 | -8,37 |
| SWI5 | -18,26 | PAPSS1 | -18,98 | CCDC47 | -4,61 |
| CHD6 | -14,14 | gene:ENSSSCG00000015491 | -16,28 | ING3 | -4,11 |
| FAM114A1 | -13,86 | ZBTB37 | -14,77 | UBAP2L | -4,06 |
| PPP1R9A | -13,08 | SMARCA2 | -13,94 | gene:ENSSSCG00000002722 | -3,06 |
| YPEL2 | -12,59 | SFT2D2 | -13,77 | gene:ENSSSCG00000015337 | -2,90 |
| gene:ENSSSCG00000035037 | -12,35 | NXN | -12,01 | EMILIN2 | -2,86 |
| RCAN2 | -12,06 | SLC5A3 | -11,40 | MICU2 | -2,84 |
| SLC5A3 | -11,95 | SYPL1 | -9,79 | PSMC3 | -2,74 |
| PRKCI | -11,72 | PTPRG | -9,59 | RBM25 | -2,74 |
| SGSM1 | -11,45 | NET1 | -9,39 | LAMC1 | -2,68 |
| NBAS | -11,43 | OS9 | -9,14 | LAP3 | -2,43 |
| GUSB | -10,96 | SYNE2 | -8,88 | HK1 | -2,29 |
| SCEL | -10,85 | MED4 | -8,73 | gene:ENSSSCG00000035209 | -2,27 |
| PPP2R5A | -10,69 | CADM1 | -8,66 | HSPD1 | -2,26 |
| LAMP2 | -10,56 | EMB | -8,48 | EEA1 | -2,25 |
| VPS13C | -10,30 | HLTF | -8,32 | gene:ENSSSCG00000042436 | -2,20 |
| KANK2 | -9,75 | gene:ENSSSCG00000035037 | -8,24 | gene:ENSSSCG00000022176 | -2,19 |
| MTURN | -9,54 | CMTM4 | -8,20 | CCN3 | -2,07 |
| TNIK | -9,40 | ATP11C | -8,09 | gene:ENSSSCG00000043470 | -2,07 |
| UACA | -9,32 | RCAN2 | -7,97 | FNBP1L | -2,01 |
| LIMCH1 | -9,26 | ITGB4 | -7,92 | gene:ENSSSCG00000036350 | -2,01 |
| CADM1 | -9,22 | SEC31A | -7,92 | SMARCC1 | -1,90 |
| R3HDM2 | -9,15 | MYO6 | -7,43 | PTGES | -1,85 |
| NXN | -8,66 | SIL1 | -7,43 | ITGA2 | -1,71 |
| FNBP1L | -8,66 | DLG1 | -7,20 | HSP90AB1 | -1,68 |
| PDK3 | -8,53 | FARP1 | -7,09 | SYVN1 | -1,66 |
| ATP11C | -8,52 | SMPDL3B | -7,05 |  |  |
| SGMS2 | -8,41 | FAM114A1 | -7,02 |  |  |
| CGNL1 | -8,39 | FAM162A | -6,96 |  |  |
| SEC31A | -8,31 | gene:ENSSSCG00000040337 | -6,91 |  |  |
| GOLM1 | -8,17 | ATRX | -6,87 |  |  |
| GPC1 | -8,13 | ARHGAP5 | -6,69 |  |  |
| gene:ENSSSCG00000004511 | -7,96 | DPCD | -6,68 |  |  |
| NF1 | -7,79 | PMEPA1 | -6,59 |  |  |
| SIL1 | -7,79 | TCEA3 | -6,59 |  |  |
| USO1 | -7,72 | ASH1L | -6,58 |  |  |
| OXR1 | -7,67 | UBXN1 | -6,35 |  |  |
| FCHSD2 | -7,66 | STRBP | -6,35 |  |  |
| SACM1L | -7,66 | SGSM1 | -6,18 |  |  |
| SMG1 | -7,63 | USO1 | -6,17 |  |  |
| COPB1 | -7,60 | PTPRF | -6,16 |  |  |
| ATRX | -7,57 | TSPO | -6,07 |  |  |
| SGPP2 | -7,57 | MTSS1 | -6,06 |  |  |
| PPP1R21 | -7,54 | IQGAP2 | -6,05 |  |  |
| gene:ENSSSCG00000012074 | -7,54 | PRKCI | -5,96 |  |  |
| GPBP1 | -7,37 | MYOF | -5,91 |  |  |
| gene:ENSSSCG00000026996 | -7,34 | BIRC6 | -5,87 |  |  |
| PPME1 | -7,32 | MRPL37 | -5,83 |  |  |
| SYNE2 | -7,32 | NBAS | -5,81 |  |  |
| SLC39A10 | -7,24 | ARHGAP18 | -5,81 |  |  |
| EXOC1 | -7,17 | C3 | -5,81 |  |  |
| SLC44A2 | -7,13 | CEP290 | -5,79 |  |  |
| DPP4 | -7,09 | VPS13C | -5,79 |  |  |
| DCTN2 | -7,00 | gene:ENSSSCG00000004387 | -5,68 |  |  |
| BBX | -6,97 | PDK3 | -5,67 |  |  |
| PATJ | -6,94 | CLSTN1 | -5,66 |  |  |
| SPTBN1 | -6,89 | UTRN | -5,61 |  |  |
| gene:ENSSSCG00000009501 | -6,82 | ARFIP1 | -5,52 |  |  |
| COL5A1 | -6,82 | PPP1R21 | -5,51 |  |  |
| TNRC6B | -6,80 | XPO1 | -5,48 |  |  |
| CLCN5 | -6,74 | gene:ENSSSCG00000040990 | -5,47 |  |  |
| EIF2AK2 | -6,74 | CYP20A1 | -5,42 |  |  |
| APPL1 | -6,71 | gene:ENSSSCG00000022032 | -5,39 |  |  |
| PCMTD1 | -6,70 | CPNE3 | -5,30 |  |  |
| PALLD | -6,70 | KIF20B | -5,25 |  |  |
| STRBP | -6,68 | TMEM30A | -5,25 |  |  |
| DTNA | -6,66 | ASPH | -5,02 |  |  |
| ATP2B4 | -6,65 | NPNT | -4,89 |  |  |
| ACBD3 | -6,63 | DSP | -4,86 |  |  |
| MICU2 | -6,58 | KANK2 | -4,85 |  |  |
| CUEDC1 | -6,58 | AGRN | -4,83 |  |  |
| ATXN10 | -6,57 | IGFBP7 | -4,81 |  |  |
| MIPEP | -6,54 | LIMCH1 | -4,71 |  |  |
| gene:ENSSSCG00000015491 | -6,54 | NDUFS4 | -4,63 |  |  |
| ROCK2 | -6,44 | gene:ENSSSCG00000017509 | -4,61 |  |  |
| TGFB1 | -6,44 | USP8 | -4,58 |  |  |
| KCNK12 | -6,15 | TM9SF4 | -4,55 |  |  |
| ROBO1 | -6,15 | TRMT10A | -4,55 |  |  |
| BICC1 | -6,14 | MEST | -4,52 |  |  |
| ILRUN | -6,14 | SCEL | -4,46 |  |  |
| NAB1 | -6,10 | gene:ENSSSCG00000012074 | -4,46 |  |  |
| ACBD6 | -6,09 | FNDC3A | -4,44 |  |  |
| NRDC | -6,09 | COX7A2L | -4,41 |  |  |
| ZNF292 | -6,09 | ACAP2 | -4,35 |  |  |
| TMEM52 | -6,06 | gene:ENSSSCG00000026996 | -4,35 |  |  |
| RHOA | -5,99 | USP14 | -4,34 |  |  |
| EGFR | -5,94 | CXCL14 | -4,27 |  |  |
| DIAPH3 | -5,94 | F3 | -4,18 |  |  |
| C1orf21 | -5,92 | gene:ENSSSCG00000049831 | -4,15 |  |  |
| ARFIP1 | -5,79 | PRRG1 | -4,12 |  |  |
| ASPM | -5,76 | CALD1 | -4,05 |  |  |
| IQGAP2 | -5,75 | ITGAV | -4,03 |  |  |
| DYNC2H1 | -5,73 | ECHS1 | -4,03 |  |  |
| SORT1 | -5,71 | ERC1 | -3,99 |  |  |
| ASH1L | -5,67 | THRAP3 | -3,98 |  |  |
| CFDP1 | -5,65 | LAMP2 | -3,98 |  |  |
| gene:ENSSSCG00000020686 | -5,63 | ZNF292 | -3,95 |  |  |
| JAK1 | -5,61 | ARHGEF12 | -3,95 |  |  |
| LOXL2 | -5,55 | VIRMA | -3,94 |  |  |
| CPSF3 | -5,55 | BBX | -3,93 |  |  |
| SFT2D2 | -5,53 | TPM1 | -3,93 |  |  |
| RAI14 | -5,53 | TEAD1 | -3,92 |  |  |
| KIF20B | -5,52 | LARS1 | -3,90 |  |  |
| UBR4 | -5,52 | SEMA3C | -3,88 |  |  |
| MYO6 | -5,44 | CNOT1 | -3,85 |  |  |
| CCN3 | -5,42 | gene:ENSSSCG00000040056 | -3,76 |  |  |
| LARS1 | -5,41 | DCBLD2 | -3,75 |  |  |
| ARCN1 | -5,38 | SGPP2 | -3,71 |  |  |
| KRT18 | -5,34 | TM9SF2 | -3,71 |  |  |
| CALD1 | -5,34 | CDH6 | -3,66 |  |  |
| HLA-DRA | -5,33 | UBXN4 | -3,65 |  |  |
| gene:ENSSSCG00000020872 | -5,32 | PDK1 | -3,65 |  |  |
| UTRN | -5,13 | ROCK2 | -3,64 |  |  |
| IFT57 | -5,13 | GOLM1 | -3,60 |  |  |
| XPO7 | -5,11 | CPSF3 | -3,57 |  |  |
| PAWR | -5,08 | ROBO1 | -3,57 |  |  |
| ITPR2 | -5,03 | IDH2 | -3,54 |  |  |
| HK1 | -4,95 | MAP1B | -3,54 |  |  |
| C3 | -4,94 | ARFGAP3 | -3,52 |  |  |
| RSRC1 | -4,89 | ADGRG1 | -3,52 |  |  |
| NDUFS4 | -4,86 | AP2B1 | -3,50 |  |  |
| DNMT1 | -4,85 | IGF2BP2 | -3,49 |  |  |
| CNOT1 | -4,81 | VGLL4 | -3,49 |  |  |
| ERBIN | -4,81 | ACBD3 | -3,49 |  |  |
| LAMB3 | -4,79 | MFF | -3,48 |  |  |
| gene:ENSSSCG00000042436 | -4,71 | P4HA1 | -3,46 |  |  |
| BIRC6 | -4,70 | LAMB3 | -3,44 |  |  |
| gene:ENSSSCG00000001455 | -4,66 | STAG2 | -3,44 |  |  |
| SMARCA2 | -4,66 | GM2A | -3,43 |  |  |
| KTN1 | -4,65 | FN1 | -3,41 |  |  |
| NAGA | -4,61 | SH3GLB1 | -3,39 |  |  |
| CALCOCO2 | -4,58 | LOXL2 | -3,38 |  |  |
| gene:ENSSSCG00000015011 | -4,57 | CCNI | -3,38 |  |  |
| USP14 | -4,56 | CTNNA1 | -3,37 |  |  |
| NES | -4,56 | VPS36 | -3,36 |  |  |
| ZMYND11 | -4,55 | DIAPH2 | -3,34 |  |  |
| MYOF | -4,53 | DYNC1LI2 | -3,33 |  |  |
| NUCB1 | -4,52 | COL5A1 | -3,32 |  |  |
| DCDC2 | -4,49 | PCM1 | -3,31 |  |  |
| PPFIBP1 | -4,49 | CAMK2D | -3,30 |  |  |
| gene:ENSSSCG00000007322 | -4,49 | JAK1 | -3,29 |  |  |
| CCDC80 | -4,45 | MTURN | -3,29 |  |  |
| IQGAP1 | -4,44 | gene:ENSSSCG00000034871 | -3,27 |  |  |
| PRPF6 | -4,44 | gene:ENSSSCG00000028092 | -3,25 |  |  |
| ARL13B | -4,39 | SLC22A18 | -3,25 |  |  |
| SEMA3C | -4,39 | TPP1 | -3,23 |  |  |
| LAMC1 | -4,37 | RAB10 | -3,22 |  |  |
| AP3B1 | -4,34 | SKIL | -3,21 |  |  |
| PDS5B | -4,33 | DTNA | -3,21 |  |  |
| PM20D2 | -4,31 | PPME1 | -3,21 |  |  |
| PTPRG | -4,31 | EGFR | -3,21 |  |  |
| FAM13A | -4,31 | LAD1 | -3,20 |  |  |
| CLTC | -4,27 | CETN3 | -3,18 |  |  |
| PLOD1 | -4,26 | SORT1 | -3,17 |  |  |
| IDH2 | -4,24 | SUPT3H | -3,16 |  |  |
| KRT8 | -4,23 | LAMC2 | -3,14 |  |  |
| ARFGAP3 | -4,22 | LRPAP1 | -3,14 |  |  |
| PDK1 | -4,19 | ENO1 | -3,11 |  |  |
| ERC1 | -4,19 | CD2AP | -3,11 |  |  |
| PFKP | -4,19 | TUBB2B | -3,10 |  |  |
| gene:ENSSSCG00000003047 | -4,19 | KRT14 | -3,09 |  |  |
| WDR1 | -4,16 | NF1 | -3,08 |  |  |
| AGRN | -4,16 | IQGAP1 | -3,07 |  |  |
| FBXO2 | -4,15 | CD44 | -3,07 |  |  |
| ARHGEF12 | -4,15 | BICC1 | -3,07 |  |  |
| STAG2 | -4,13 | SYT11 | -3,05 |  |  |
| RALA | -4,10 | ATP6V1C1 | -3,03 |  |  |
| EIF2A | -4,08 | RAB6A | -3,03 |  |  |
| WASF2 | -4,06 | FAM13A | -3,01 |  |  |
| STRN | -4,05 | CCDC88A | -3,01 |  |  |
| CD2AP | -4,04 | BAZ1B | -3,01 |  |  |
| ASCC3 | -4,03 | BNIP3L | -3,00 |  |  |
| NSMCE1 | -4,02 | COPB1 | -2,99 |  |  |
| TPM1 | -4,00 | gene:ENSSSCG00000009501 | -2,99 |  |  |
| ACAP2 | -3,95 | DHX29 | -2,98 |  |  |
| RIF1 | -3,94 | ATP2B4 | -2,97 |  |  |
| gene:ENSSSCG00000006156 | -3,94 | APLP2 | -2,95 |  |  |
| HLTF | -3,92 | DEPDC1B | -2,94 |  |  |
| DLG1 | -3,89 | RBM26 | -2,94 |  |  |
| DDB1 | -3,86 | ATP1A1 | -2,94 |  |  |
| SMPDL3B | -3,86 | CALCOCO2 | -2,93 |  |  |
| IGF2BP2 | -3,85 | OPTN | -2,93 |  |  |
| RNF13 | -3,84 | KIF2A | -2,91 |  |  |
| gene:ENSSSCG00000004387 | -3,84 | PDGFA | -2,90 |  |  |
| MSI2 | -3,81 | UACA | -2,87 |  |  |
| HSPG2 | -3,79 | SMARCC1 | -2,86 |  |  |
| OS9 | -3,79 | ME1 | -2,85 |  |  |
| DAZAP1 | -3,78 | DCTN2 | -2,85 |  |  |
| gene:ENSSSCG00000040990 | -3,78 | EXOC1 | -2,84 |  |  |
| ZNF609 | -3,77 | MICU2 | -2,83 |  |  |
| GOLGB1 | -3,75 | gene:ENSSSCG00000042436 | -2,82 |  |  |
| LAD1 | -3,74 | KRT18 | -2,80 |  |  |
| EMILIN2 | -3,73 | KRT8 | -2,79 |  |  |
| EEA1 | -3,71 | CRK | -2,78 |  |  |
| GOLGA4 | -3,70 | EIF4G3 | -2,77 |  |  |
| FNDC3A | -3,69 | ENAH | -2,77 |  |  |
| SLC22A18 | -3,64 | FNBP1L | -2,76 |  |  |
| TRMT10A | -3,63 | PPFIBP1 | -2,75 |  |  |
| TRIP11 | -3,63 | ITGB1 | -2,74 |  |  |
| GFPT1 | -3,63 | ARHGAP29 | -2,71 |  |  |
| SRBD1 | -3,63 | GNB1 | -2,71 |  |  |
| UGP2 | -3,63 | PPIG | -2,71 |  |  |
| ZC3HAV1 | -3,63 | KTN1 | -2,70 |  |  |
| ITGB1 | -3,62 | RRBP1 | -2,69 |  |  |
| GRN | -3,61 | CTSH | -2,68 |  |  |
| ENAH | -3,57 | gene:ENSSSCG00000008183 | -2,68 |  |  |
| APLP2 | -3,56 | PTBP3 | -2,68 |  |  |
| RRBP1 | -3,55 | CALM3 | -2,66 |  |  |
| LRPAP1 | -3,54 | PRC1 | -2,66 |  |  |
| CEP290 | -3,54 | FLNB | -2,65 |  |  |
| SMARCC1 | -3,53 | ZRANB2 | -2,63 |  |  |
| BHLHE41 | -3,52 | ITPR2 | -2,62 |  |  |
| MAP1LC3A | -3,52 | DDX1 | -2,61 |  |  |
| POLE4 | -3,49 | NPEPPS | -2,60 |  |  |
| SKA2 | -3,49 | ZNF395 | -2,57 |  |  |
| SYT11 | -3,49 | LMO7 | -2,56 |  |  |
| CAMK2D | -3,49 | KLF10 | -2,55 |  |  |
| VEGFA | -3,48 | GOLGB1 | -2,54 |  |  |
| gene:ENSSSCG00000014909 | -3,47 | ST13 | -2,53 |  |  |
| SUMF1 | -3,47 | CDC5L | -2,52 |  |  |
| AIRE | -3,47 | SLK | -2,48 |  |  |
| gene:ENSSSCG00000001924 | -3,47 | gene:ENSSSCG00000034853 | -2,48 |  |  |
| PCM1 | -3,47 | SUMF1 | -2,48 |  |  |
| NPNT | -3,46 | CENPF | -2,47 |  |  |
| PRC1 | -3,46 | CBX5 | -2,46 |  |  |
| ME1 | -3,46 | ERO1A | -2,44 |  |  |
| FUOM | -3,44 | gene:ENSSSCG00000040827 | -2,44 |  |  |
| UBXN1 | -3,44 | P4HB | -2,43 |  |  |
| ITGA2 | -3,43 | TGFB1 | -2,42 |  |  |
| ASPH | -3,41 | HSPG2 | -2,41 |  |  |
| SLK | -3,41 | EVI5 | -2,41 |  |  |
| gene:ENSSSCG00000036274 | -3,41 | ANXA13 | -2,37 |  |  |
| DLGAP5 | -3,40 | EIF2A | -2,36 |  |  |
| gene:ENSSSCG00000038557 | -3,40 | TAX1BP1 | -2,36 |  |  |
| ITGB3 | -3,40 | SRP72 | -2,35 |  |  |
| SMARCC2 | -3,40 | DHX40 | -2,35 |  |  |
| HUWE1 | -3,39 | COPB2 | -2,35 |  |  |
| VWA1 | -3,39 | gene:ENSSSCG00000003903 | -2,35 |  |  |
| EFNB1 | -3,38 | GLUD1 | -2,32 |  |  |
| PTPRF | -3,38 | FXR1 | -2,32 |  |  |
| EPCAM | -3,36 | CFDP1 | -2,30 |  |  |
| CXCL14 | -3,35 | NUCKS1 | -2,30 |  |  |
| FN1 | -3,34 | CPD | -2,30 |  |  |
| ACSL4 | -3,34 | SEPTIN7 | -2,29 |  |  |
| SMS | -3,33 | CCN3 | -2,28 |  |  |
| gene:ENSSSCG00000038144 | -3,32 | gene:ENSSSCG00000035209 | -2,28 |  |  |
| CPNE3 | -3,31 | gene:ENSSSCG00000016330 | -2,26 |  |  |
| DEPDC1B | -3,31 | CCDC80 | -2,26 |  |  |
| OPTN | -3,27 | BHLHE41 | -2,26 |  |  |
| CCDC47 | -3,25 | FLNA | -2,25 |  |  |
| PPP2R3C | -3,25 | PNISR | -2,25 |  |  |
| DST | -3,25 | RSF1 | -2,23 |  |  |
| CDH6 | -3,23 | SUCLG2 | -2,21 |  |  |
| TCEA3 | -3,21 | gene:ENSSSCG00000000697 | -2,21 |  |  |
| PAPSS1 | -3,20 | gene:ENSSSCG00000033497 | -2,17 |  |  |
| ERO1A | -3,20 | gene:ENSSSCG00000007322 | -2,17 |  |  |
| DSP | -3,18 | gene:ENSSSCG00000017164 | -2,14 |  |  |
| BAZ1B | -3,17 | VIM | -2,13 |  |  |
| AP2M1 | -3,16 | PTGES | -2,10 |  |  |
| LAMP1 | -3,14 | EPCAM | -2,10 |  |  |
| CAP1 | -3,13 | HK1 | -2,10 |  |  |
| gene:ENSSSCG00000040337 | -3,13 | ANKRD12 | -2,06 |  |  |
| ADAM9 | -3,13 | RDX | -2,06 |  |  |
| VPS35 | -3,12 | LDHA | -2,04 |  |  |
| BCAM | -3,10 | RBPJ | -2,03 |  |  |
| DHX40 | -3,09 | PDIA3 | -1,97 |  |  |
| CPD | -3,08 |  |  |  |  |
| TUBB2B | -3,07 |  |  |  |  |
| RBBP7 | -3,06 |  |  |  |  |
| RSF1 | -3,04 |  |  |  |  |
| gene:ENSSSCG00000002825 | -3,03 |  |  |  |  |
| VIRMA | -3,03 |  |  |  |  |
| CETN3 | -2,99 |  |  |  |  |
| SHTN1 | -2,99 |  |  |  |  |
| AP2B1 | -2,99 |  |  |  |  |
| PTGES | -2,98 |  |  |  |  |
| VDAC1 | -2,96 |  |  |  |  |
| CLGN | -2,96 |  |  |  |  |
| COPB2 | -2,96 |  |  |  |  |
| TPP1 | -2,96 |  |  |  |  |
| CHD9 | -2,96 |  |  |  |  |
| CMIP | -2,96 |  |  |  |  |
| CCDC181 | -2,95 |  |  |  |  |
| KRT14 | -2,94 |  |  |  |  |
| PLEC | -2,94 |  |  |  |  |
| PDGFA | -2,94 |  |  |  |  |
| RAB6A | -2,93 |  |  |  |  |
| COPA | -2,93 |  |  |  |  |
| TM9SF4 | -2,92 |  |  |  |  |
| GLG1 | -2,90 |  |  |  |  |
| gene:ENSSSCG00000016330 | -2,90 |  |  |  |  |
| ZNF395 | -2,90 |  |  |  |  |
| CCDC88A | -2,86 |  |  |  |  |
| NUCKS1 | -2,84 |  |  |  |  |
| PRKCSH | -2,83 |  |  |  |  |
| RDX | -2,83 |  |  |  |  |
| TLN1 | -2,83 |  |  |  |  |
| F3 | -2,82 |  |  |  |  |
| FLNA | -2,80 |  |  |  |  |
| P4HA2 | -2,80 |  |  |  |  |
| USP8 | -2,80 |  |  |  |  |
| FLNB | -2,80 |  |  |  |  |
| gene:ENSSSCG00000017783 | -2,78 |  |  |  |  |
| gene:ENSSSCG00000035209 | -2,78 |  |  |  |  |
| PMEPA1 | -2,76 |  |  |  |  |
| EVI5 | -2,76 |  |  |  |  |
| HADHA | -2,75 |  |  |  |  |
| PSME1 | -2,74 |  |  |  |  |
| BCAT1 | -2,71 |  |  |  |  |
| TAX1BP1 | -2,71 |  |  |  |  |
| PHACTR4 | -2,70 |  |  |  |  |
| TTC3 | -2,70 |  |  |  |  |
| gene:ENSSSCG00000007314 | -2,70 |  |  |  |  |
| BAIAP2 | -2,69 |  |  |  |  |
| HDAC7 | -2,69 |  |  |  |  |
| CBX5 | -2,67 |  |  |  |  |
| CENPF | -2,66 |  |  |  |  |
| gene:ENSSSCG00000017164 | -2,64 |  |  |  |  |
| APP | -2,61 |  |  |  |  |
| BRD7 | -2,61 |  |  |  |  |
| SMC3 | -2,60 |  |  |  |  |
| SUPT3H | -2,58 |  |  |  |  |
| RBPJ | -2,57 |  |  |  |  |
| FNDC3B | -2,56 |  |  |  |  |
| SEPTIN10 | -2,55 |  |  |  |  |
| TOP2B | -2,55 |  |  |  |  |
| H2AC20 | -2,54 |  |  |  |  |
| gene:ENSSSCG00000022032 | -2,54 |  |  |  |  |
| AP1B1 | -2,54 |  |  |  |  |
| LAP3 | -2,53 |  |  |  |  |
| CST6 | -2,52 |  |  |  |  |
| GPD2 | -2,52 |  |  |  |  |
| NAP1L1 | -2,50 |  |  |  |  |
| FZD5 | -2,49 |  |  |  |  |
| SUCLG2 | -2,49 |  |  |  |  |
| P4HB | -2,49 |  |  |  |  |
| FZD6 | -2,48 |  |  |  |  |
| RNF181 | -2,48 |  |  |  |  |
| gene:ENSSSCG00000048341 | -2,47 |  |  |  |  |
| TUSC3 | -2,47 |  |  |  |  |
| WFDC2 | -2,47 |  |  |  |  |
| NDFIP1 | -2,46 |  |  |  |  |
| PTPN11 | -2,45 |  |  |  |  |
| gene:ENSSSCG00000000261 | -2,44 |  |  |  |  |
| SEC63 | -2,43 |  |  |  |  |
| UQCRC1 | -2,43 |  |  |  |  |
| EIF4G3 | -2,42 |  |  |  |  |
| NANS | -2,42 |  |  |  |  |
| HSPD1 | -2,42 |  |  |  |  |
| DDX6 | -2,42 |  |  |  |  |
| gene:ENSSSCG00000000697 | -2,41 |  |  |  |  |
| gene:ENSSSCG00000040827 | -2,41 |  |  |  |  |
| HSP90B1 | -2,41 |  |  |  |  |
| PPP1R12A | -2,41 |  |  |  |  |
| H1-0 | -2,40 |  |  |  |  |
| GLUD1 | -2,40 |  |  |  |  |
| RAB10 | -2,39 |  |  |  |  |
| SORBS2 | -2,38 |  |  |  |  |
| SCD | -2,38 |  |  |  |  |
| PNISR | -2,37 |  |  |  |  |
| BCL2L1 | -2,37 |  |  |  |  |
| PDLIM7 | -2,37 |  |  |  |  |
| VIM | -2,37 |  |  |  |  |
| MAP4K4 | -2,36 |  |  |  |  |
| CCDC186 | -2,35 |  |  |  |  |
| gene:ENSSSCG00000033385 | -2,33 |  |  |  |  |
| CAST | -2,33 |  |  |  |  |
| gene:ENSSSCG00000005518 | -2,32 |  |  |  |  |
| MEST | -2,32 |  |  |  |  |
| ATP5F1A | -2,31 |  |  |  |  |
| RNF19A | -2,31 |  |  |  |  |
| ANKRD12 | -2,30 |  |  |  |  |
| DYNC1LI2 | -2,30 |  |  |  |  |
| LGALS1 | -2,30 |  |  |  |  |
| ICAM1 | -2,28 |  |  |  |  |
| CANX | -2,28 |  |  |  |  |
| LDHA | -2,28 |  |  |  |  |
| CSDE1 | -2,28 |  |  |  |  |
| SEPTIN7 | -2,27 |  |  |  |  |
| MXI1 | -2,26 |  |  |  |  |
| TMEM50A | -2,25 |  |  |  |  |
| LY6D | -2,25 |  |  |  |  |
| EIF4B | -2,23 |  |  |  |  |
| P4HA1 | -2,23 |  |  |  |  |
| BAZ2A | -2,23 |  |  |  |  |
| EEF1G | -2,23 |  |  |  |  |
| SMARCE1 | -2,22 |  |  |  |  |
| CARHSP1 | -2,22 |  |  |  |  |
| HSP90AB1 | -2,21 |  |  |  |  |
| gene:ENSSSCG00000038594 | -2,20 |  |  |  |  |
| gene:ENSSSCG00000049831 | -2,18 |  |  |  |  |
| MAP1B | -2,18 |  |  |  |  |
| NIPBL | -2,18 |  |  |  |  |
| ST13 | -2,16 |  |  |  |  |
| PSIP1 | -2,15 |  |  |  |  |
| ARPC2 | -2,15 |  |  |  |  |
| MSN | -2,14 |  |  |  |  |
| VPS28 | -2,13 |  |  |  |  |
| ALDOA | -2,13 |  |  |  |  |
| LMO7 | -2,12 |  |  |  |  |
| METAP2 | -2,10 |  |  |  |  |
| PARK7 | -2,09 |  |  |  |  |
| TOP2A | -2,07 |  |  |  |  |
| AKAP9 | -2,04 |  |  |  |  |
| gene:ENSSSCG00000039658 | -2,03 |  |  |  |  |
| gene:ENSSSCG00000001930 | -2,02 |  |  |  |  |
| EIF3F | -2,02 |  |  |  |  |
| GAPDH | -2,01 |  |  |  |  |
| DYNC1I2 | -2,01 |  |  |  |  |
| S100A4 | -1,98 |  |  |  |  |
| PPIG | -1,98 |  |  |  |  |
| RPL6 | -1,93 |  |  |  |  |
| RPS6 | -1,78 |  |  |  |  |

Fold change of gene expression in infected cells comparing to control (mock-infected cells).
