# Supplementary material for: Porcine Circovirus Modulates Swine Influenza Virus Replication in Pig Tracheal Epithelial Cells and Porcine Alveolar Macrophages
Source: Preprints.org preprint supplement (doi:10.20944/preprints202304.0781.v1), 2023-04-23
Supplement: Supplementary file 5 [file Supplemental table S5. Down-rgulated genes in iPAM.docx]

**Supplemental table S5. Down-regulated genes in iPAM 3D4/21 cells**

| **PCV2b/H1N1** |  | **PCV2b** |  | **H1N1** |  |
| --- | --- | --- | --- | --- | --- |
| Gene ID | Fold change | Gene ID | Fold change | Gene ID | Fold change |
| MGP | -28,88 | SENP5 | -9,48 | MGP | -39,64 |
| GSTA1 | -6,75 | MGP | -6,54 | WNT16 | -4,73 |
| MAP2 | -5,32 | EPS8 | -5,77 | BMP7 | -4,46 |
| NECTIN1 | -4,08 | TBC1D5 | -5,49 | FAM110C | -2,60 |
| SEMA3E | -3,94 | PCSK5 | -5,47 | FIBIN | -2,57 |
| PHACTR2 | -3,63 | FLRT3 | -5,30 | SCIN | -2,51 |
| MARCKS | -3,25 | WDR11 | -4,54 | IL1RL1 | -2,43 |
| SCIN | -3,03 | gene:ENSSSCG00000006725 | -4,50 | ZBTB20 | -2,32 |
| DMXL2 | -2,95 | ATM | -4,25 | MARCKS | -2,10 |
| gene:ENSSSCG00000023325 | -2,95 | SEMA3E | -4,24 | SELENOP | -2,07 |
| BICC1 | -2,91 | PLXDC2 | -3,94 | COG3 | -2,04 |
| HOMER1 | -2,69 | PBX3 | -3,69 | TCEA3 | -1,98 |
| KRT14 | -2,58 | USP13 | -3,51 | GSTA1 | -1,94 |
| SELENOP | -2,58 | ARHGAP42 | -3,44 | PTPN13 | -1,92 |
| TCEA3 | -2,56 | gene:ENSSSCG00000032297 | -3,41 | C1orf21 | -1,76 |
| LAMP1 | -2,54 | EXOC6B | -3,34 |  |  |
| FARP1 | -2,46 | PGAP1 | -3,32 |  |  |
| WWC1 | -2,43 | GSTA1 | -3,28 |  |  |
| ARHGDIB | -2,29 | TUT4 | -3,26 |  |  |
| ADAMTS1 | -2,27 | PPP2R2B | -3,26 |  |  |
| PPP2R5A | -2,25 | ASXL2 | -3,21 |  |  |
| PLS1 | -2,25 | MGAT4C | -3,17 |  |  |
| SRPK2 | -2,22 | MAP2 | -3,15 |  |  |
| SMARCA2 | -2,13 | AGL | -3,13 |  |  |
| PTPN13 | -2,03 | FAM53B | -3,03 |  |  |
| MET | -2,01 | CERT1 | -3,01 |  |  |
| TPP1 | -2,00 | GTF2I | -2,98 |  |  |
|  |  | PCLO | -2,91 |  |  |
|  |  | FAM110C | -2,89 |  |  |
|  |  | HOMER1 | -2,89 |  |  |
|  |  | BICC1 | -2,86 |  |  |
|  |  | DIP2B | -2,80 |  |  |
|  |  | DMXL2 | -2,76 |  |  |
|  |  | WWC1 | -2,71 |  |  |
|  |  | PSME3IP1 | -2,69 |  |  |
|  |  | TCEA3 | -2,69 |  |  |
|  |  | SMARCC2 | -2,67 |  |  |
|  |  | NECTIN1 | -2,67 |  |  |
|  |  | SLC16A7 | -2,66 |  |  |
|  |  | PRKD3 | -2,65 |  |  |
|  |  | URI1 | -2,65 |  |  |
|  |  | DCDC2 | -2,62 |  |  |
|  |  | KIAA1217 | -2,61 |  |  |
|  |  | PIBF1 | -2,60 |  |  |
|  |  | NRDC | -2,59 |  |  |
|  |  | CASK | -2,58 |  |  |
|  |  | ARL13B | -2,57 |  |  |
|  |  | MGME1 | -2,56 |  |  |
|  |  | PTPN13 | -2,51 |  |  |
|  |  | PLS1 | -2,51 |  |  |
|  |  | gene:ENSSSCG00000010401 | -2,50 |  |  |
|  |  | SLC37A4 | -2,49 |  |  |
|  |  | IQGAP2 | -2,49 |  |  |
|  |  | SREBF2 | -2,46 |  |  |
|  |  | ACAP2 | -2,46 |  |  |
|  |  | CNKSR2 | -2,46 |  |  |
|  |  | SMARCA2 | -2,45 |  |  |
|  |  | ZNF644 | -2,43 |  |  |
|  |  | LAMP1 | -2,43 |  |  |
|  |  | LAMC1 | -2,42 |  |  |
|  |  | gene:ENSSSCG00000023325 | -2,36 |  |  |
|  |  | R3HDM2 | -2,32 |  |  |
|  |  | ARID5B | -2,31 |  |  |
|  |  | SF3A3 | -2,28 |  |  |
|  |  | CLCN5 | -2,26 |  |  |
|  |  | MAL | -2,26 |  |  |
|  |  | MARCKS | -2,24 |  |  |
|  |  | PKD2 | -2,24 |  |  |
|  |  | NDUFV1 | -2,23 |  |  |
|  |  | MACC1 | -2,22 |  |  |
|  |  | USP47 | -2,21 |  |  |
|  |  | NR3C1 | -2,19 |  |  |
|  |  | ASPM | -2,19 |  |  |
|  |  | gene:ENSSSCG00000009501 | -2,17 |  |  |
|  |  | FARP1 | -2,16 |  |  |
|  |  | PALMD | -2,16 |  |  |
|  |  | EML4 | -2,15 |  |  |
|  |  | ZMYND11 | -2,13 |  |  |
|  |  | ENPP4 | -2,11 |  |  |
|  |  | PTPRZ1 | -2,11 |  |  |
|  |  | GNS | -2,10 |  |  |
|  |  | ACSL3 | -2,08 |  |  |
|  |  | MET | -2,08 |  |  |
|  |  | ARHGEF12 | -2,07 |  |  |
|  |  | SELENOP | -2,07 |  |  |
|  |  | AP1B1 | -2,07 |  |  |
|  |  | SORT1 | -2,06 |  |  |
|  |  | SORBS1 | -2,06 |  |  |
|  |  | IGF2BP3 | -2,05 |  |  |
|  |  | GLG1 | -2,05 |  |  |
|  |  | PPP1R21 | -2,05 |  |  |
|  |  | NPNT | -2,05 |  |  |
|  |  | UBR5 | -2,01 |  |  |
|  |  | GOLIM4 | -2,00 |  |  |
|  |  | AIFM1 | -1,99 |  |  |
|  |  | ADD3 | -1,99 |  |  |
|  |  | AP3D1 | -1,98 |  |  |
|  |  | TEAD1 | -1,97 |  |  |
|  |  | gene:ENSSSCG00000017783 | -1,97 |  |  |
|  |  | PPP2R5A | -1,96 |  |  |
|  |  | LAMB1 | -1,96 |  |  |
|  |  | TTC3 | -1,95 |  |  |
|  |  | APLP2 | -1,94 |  |  |
|  |  | ITCH | -1,93 |  |  |
|  |  | NECTIN3 | -1,93 |  |  |
|  |  | CRIM1 | -1,92 |  |  |
|  |  | DDX46 | -1,92 |  |  |
|  |  | ECPAS | -1,88 |  |  |
|  |  | CXADR | -1,88 |  |  |
|  |  | RB1CC1 | -1,86 |  |  |
|  |  | ATP11C | -1,86 |  |  |
|  |  | FOXN3 | -1,84 |  |  |
|  |  | ATP6V1C1 | -1,84 |  |  |
|  |  | SLC39A10 | -1,82 |  |  |
|  |  | gene:ENSSSCG00000002722 | -1,82 |  |  |
|  |  | IRF2BP2 | -1,82 |  |  |
|  |  | SYNE2 | -1,81 |  |  |
|  |  | SPTBN1 | -1,80 |  |  |
|  |  | KRT14 | -1,80 |  |  |
|  |  | HNRNPR | -1,80 |  |  |
|  |  | IARS1 | -1,79 |  |  |
|  |  | gene:ENSSSCG00000012102 | -1,77 |  |  |
|  |  | EHHADH | -1,77 |  |  |
|  |  | RSRC1 | -1,75 |  |  |
|  |  | ATRX | -1,71 |  |  |
|  |  | NASP | -1,69 |  |  |
|  |  | MYO6 | -1,67 |  |  |
|  |  | PSMD2 | -1,66 |  |  |
|  |  | PTGFRN | -1,66 |  |  |
|  |  | CALD1 | -1,66 |  |  |
|  |  | SMARCC1 | -1,65 |  |  |
|  |  | TOP2B | -1,62 |  |  |

Fold change of gene expression in infected cells comparing to control (mock-infected cells).
